# Supplementary material
Source: Research Square preprint supplement (doi:10.21203/rs.3.rs-9688452/v1)
Supplement: Supplementary file 1 [file 7c9c1c6a5344e831695b9633.docx]

**Supplemental Materials**

*for*

Widefield Nanodiamond Quantum Sensing Based on Light-Sheet Microscopy

*Shuo Wang et al.*


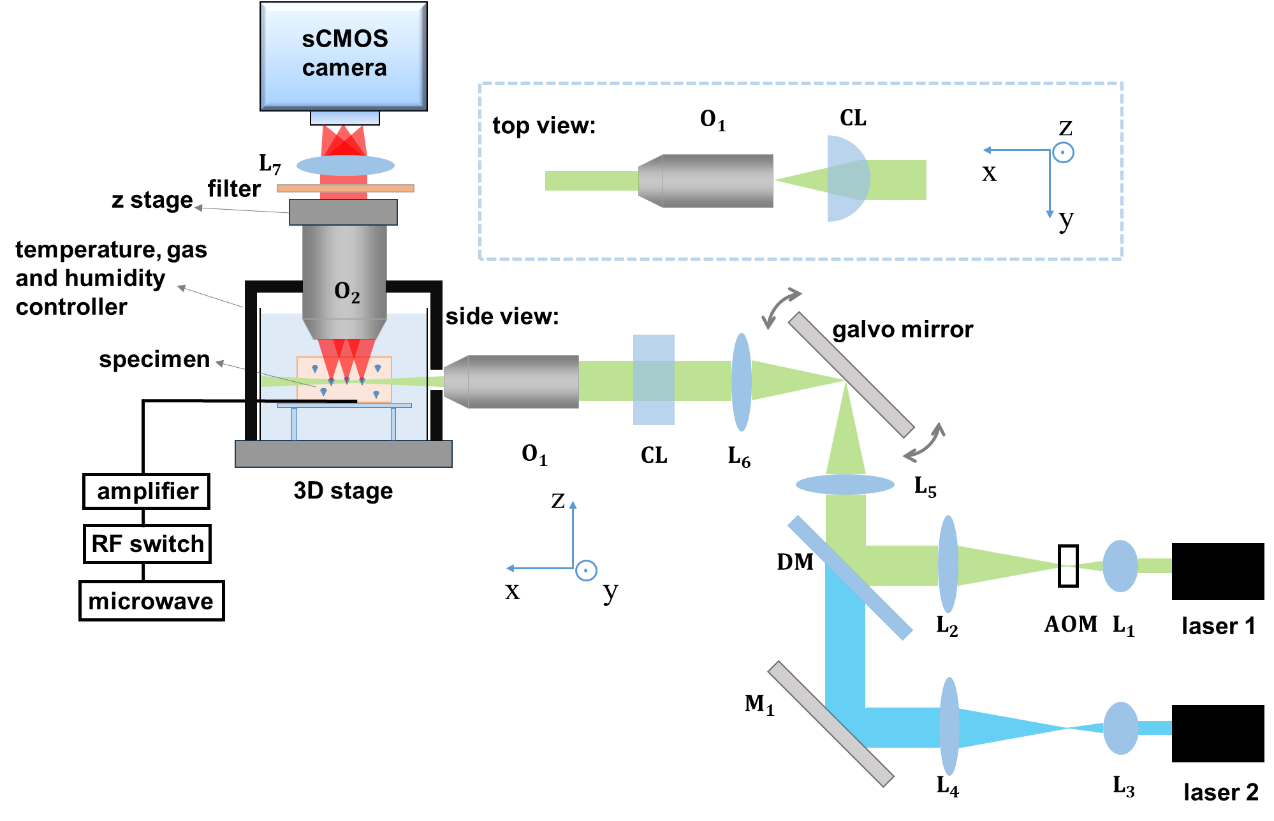


**Supplementary Figure S1 | Schematic of the LSM-ODMR setup.** Laser 1 was a 532 nm laser (MGL-F-532-3W, CNI) to excite NV centers, which also excited cell dyes. Laser 1 was modulated by an acousto-optic modulator (AOM, 3100-125, Gooch & Housego). Laser 2 was a 473 nm laser (MBL-FN-473-200mW) to excite cell dyes. After expanded by a couple of convex lenses (L1 and L2 for laser 1, L3 and L4 for laser 2), the two laser beams were combined by a dichroic mirror (DM). After passing through a galvo mirror (GVS012-M, Thorlabs), a cylindrical lens (CL) and the excitation objective O1 (Nikon 10×, air immersion, NA=0.21), a light sheet was formed near the focal plane of O1. The sample was illuminated from the side by this light sheet. The blue laser (Laser 2) was employed exclusively for cell imaging and was turned off during the sensing experiments to minimize photodamage. The galvo mirror was used to scan the light sheet along the -axis to realize three-dimensional imaging and sensing. Fluorescence from the NV centers and cell dyes was collected by the detection objective O2 (Nikon 60×, water dipping, NA=1.0) and detected by an sCMOS camera (Prime 95B, Photometrics). Different filters could be configured before the sCMOS camera to collect the fluorescence in certain wavelength ranges. O2 was mounted on a -axis piezoelectric stage (P72.Z100S, Coremorrow) to enable its axial scanning.The sample was mounted on a 3D stage (Thorlabs, MAX311D/M, with manual and piezoelectric control, manual adjustment range: about 20 mm; piezoelectric control adjustment range: about 20 m. Controller: BPC303, Thorlabs). The fluorescence collection light path was integrated with a microscope (FN1, Nikon). Microwave from a signal generator (SG386, Stanford Research Systems) was gated by an RF switch (ZASWA-2-50DRA+, Mini-Circuits), amplified by a microwave amplifier (ZHL-16W-43-S+, Mini-Circuits) and then introduced to the sample by an antenna to drive the NV center spins. The pulse sequences used for LSM- relaxometry were generated by a pulse generator (Pulse Streamer 8/2, Swabian Instruments) and sent to AOM, RF switch and the sCMOS camera. Environmental conditions (temperature, concentration, and humidity) within the sample dish were maintained using dedicated controllers (H301-T-UNIT-BL-PLUS, CO2-O2-UNIT-BL [0-10; 1-18], and HM-ACTIVE, all from Okolab).


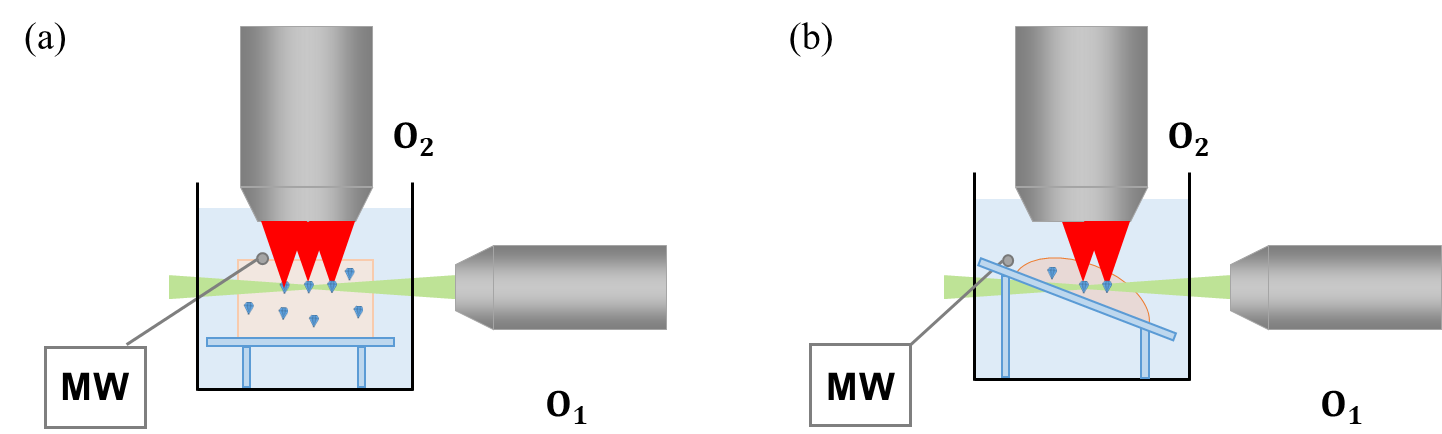


**Supplementary Figure S2 | Schematic of sample dishes.** The samples were fixed in a small dish filled with water or culture medium. For those samples with a certain thickness, like bulk diamond samples and agarose-embedded samples, the coverslip holding the sample was placed horizontally, as shown in (a); while for those adherent samples, such as a coverslip with nanodiamonds (NDs) dropped on it directly, and adherent cell samples, the exciting light would pass through the horizontal coverslip, which would introduce aberration. To avoid this, adherent samples were mounted at a defined tilt angle. The optimized angle was set at approximately 25° relative to the horizontal plane to avoid aberration while the detection objective O2 was not influenced, as shown in (b).


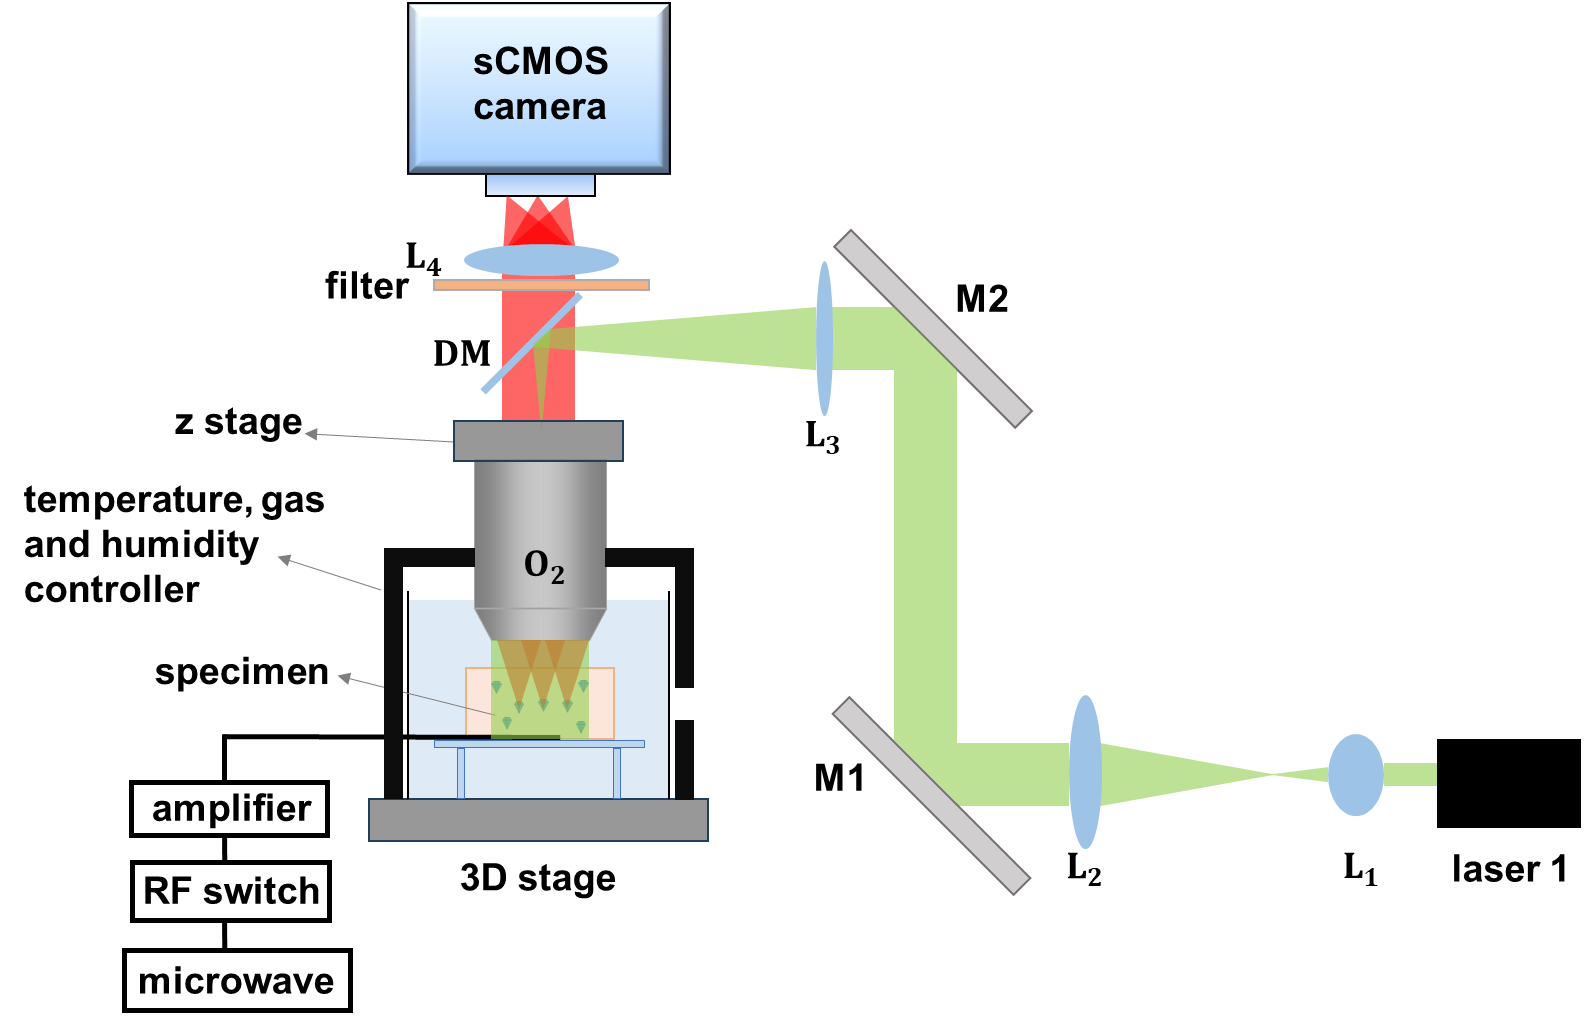


**Supplementary Figure S3 | Schematic of the conventional widefield setup.** The widefield mode was implemented by switching 532 nm Laser 1 in the LSM-ODMR setup to an alternative optical path, where it was coupled into the back aperture of the collection objective O2 for epi-illumination. The fluorescence detection path remained the same as in the LSM setup.

**
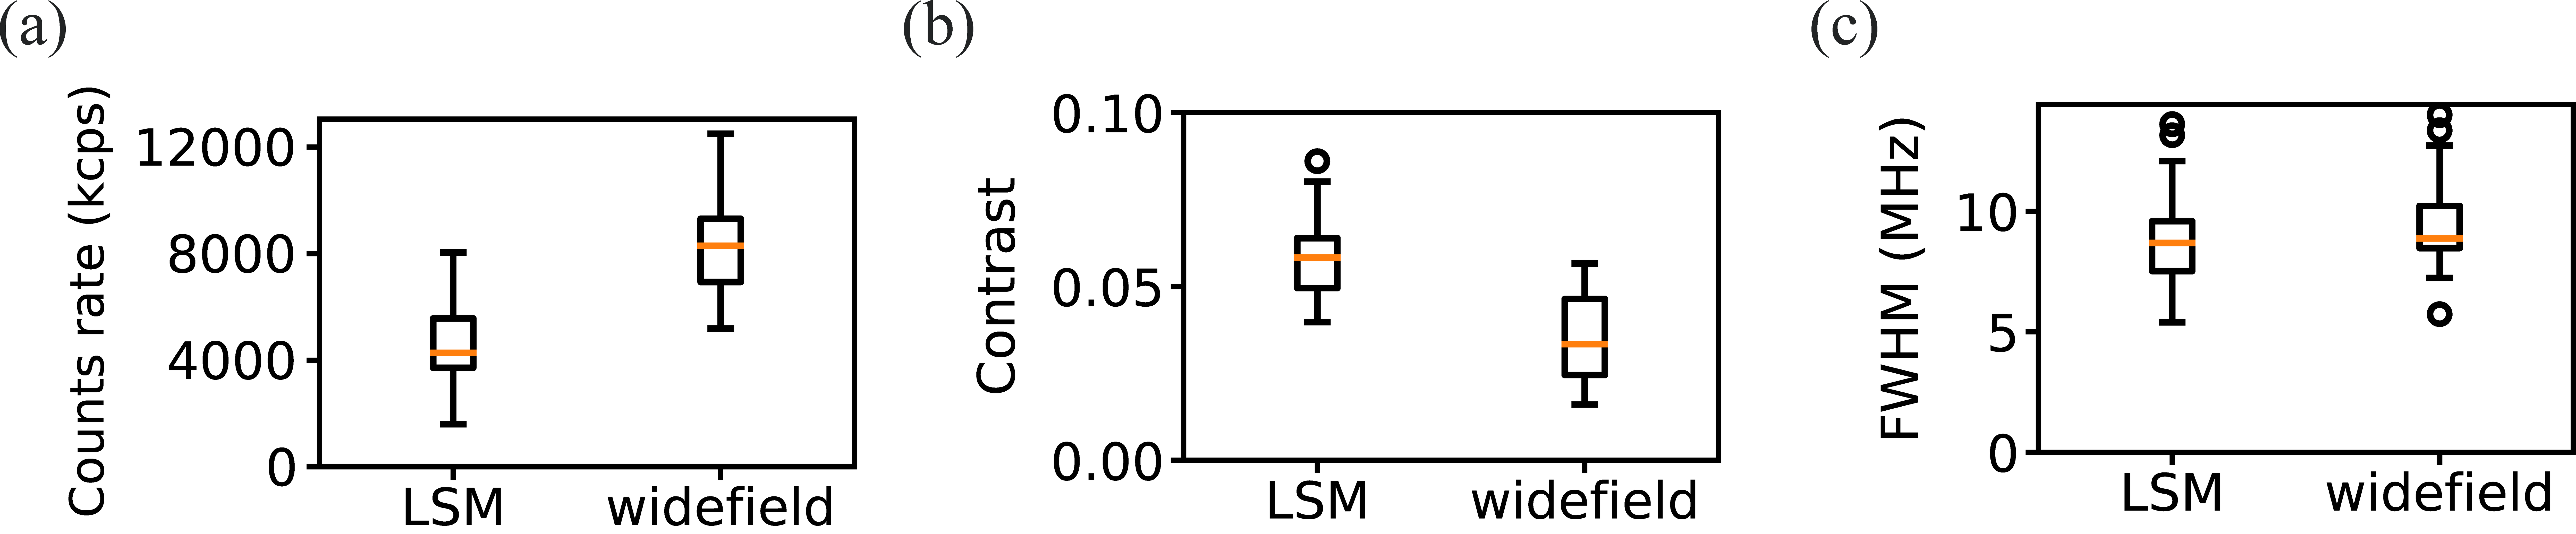
**

**Supplementary Figure S4 | Comparison of photon counts, ODMR contrasts and ODMR linewidths for the same 28 NDs in Fig. 3(e) in BCECF-stained HeLa cells under LSM and conventional widefield excitation.** The laser power density was about 5 . Under LSM illumination, the average photon count rate and ODMR contrast were approximately 4486 kcps and 5.76%, respectively. In contrast, widefield illumination yielded a higher count rate of about 8236 kcps, which was attributed to increased background fluorescence, and a lower average ODMR contrast of 3.52%. The amount of photon count increase and that of contrast reduction under widefield illumination were consistent. The ODMR linewidths showed a slight difference, being 8.84 MHz for LSM and 9.41 MHz for widefield (full width at half maximum, FWHM).

**

**

**Supplementary Figure** **S5 |** Propidium Iodide (PI) staining for assessing HeLa cell viability, with cell images captured at different times. (a) Time-lapse images of three representative HeLa cells under LSM illumination. PI was added prior to the experiment. At t=60 min, no PI uptake was observed; only fluorescence from NDs was detected. By t=80 min, the two cells on the right were brightly stained by PI, exhibiting strong red fluorescence and membrane blebbing, which indicate cell death. At t=100 min, all three cells displayed intense red fluorescence and pronounced blebbing, indicating that all had died. (b) Time-lapse images of three representative HeLa cells under widefield illumination. At t=10 min, one cell died. All three cells died at t=20 min. The tick marks on both axes in all panels of (a) and (b) are in m.


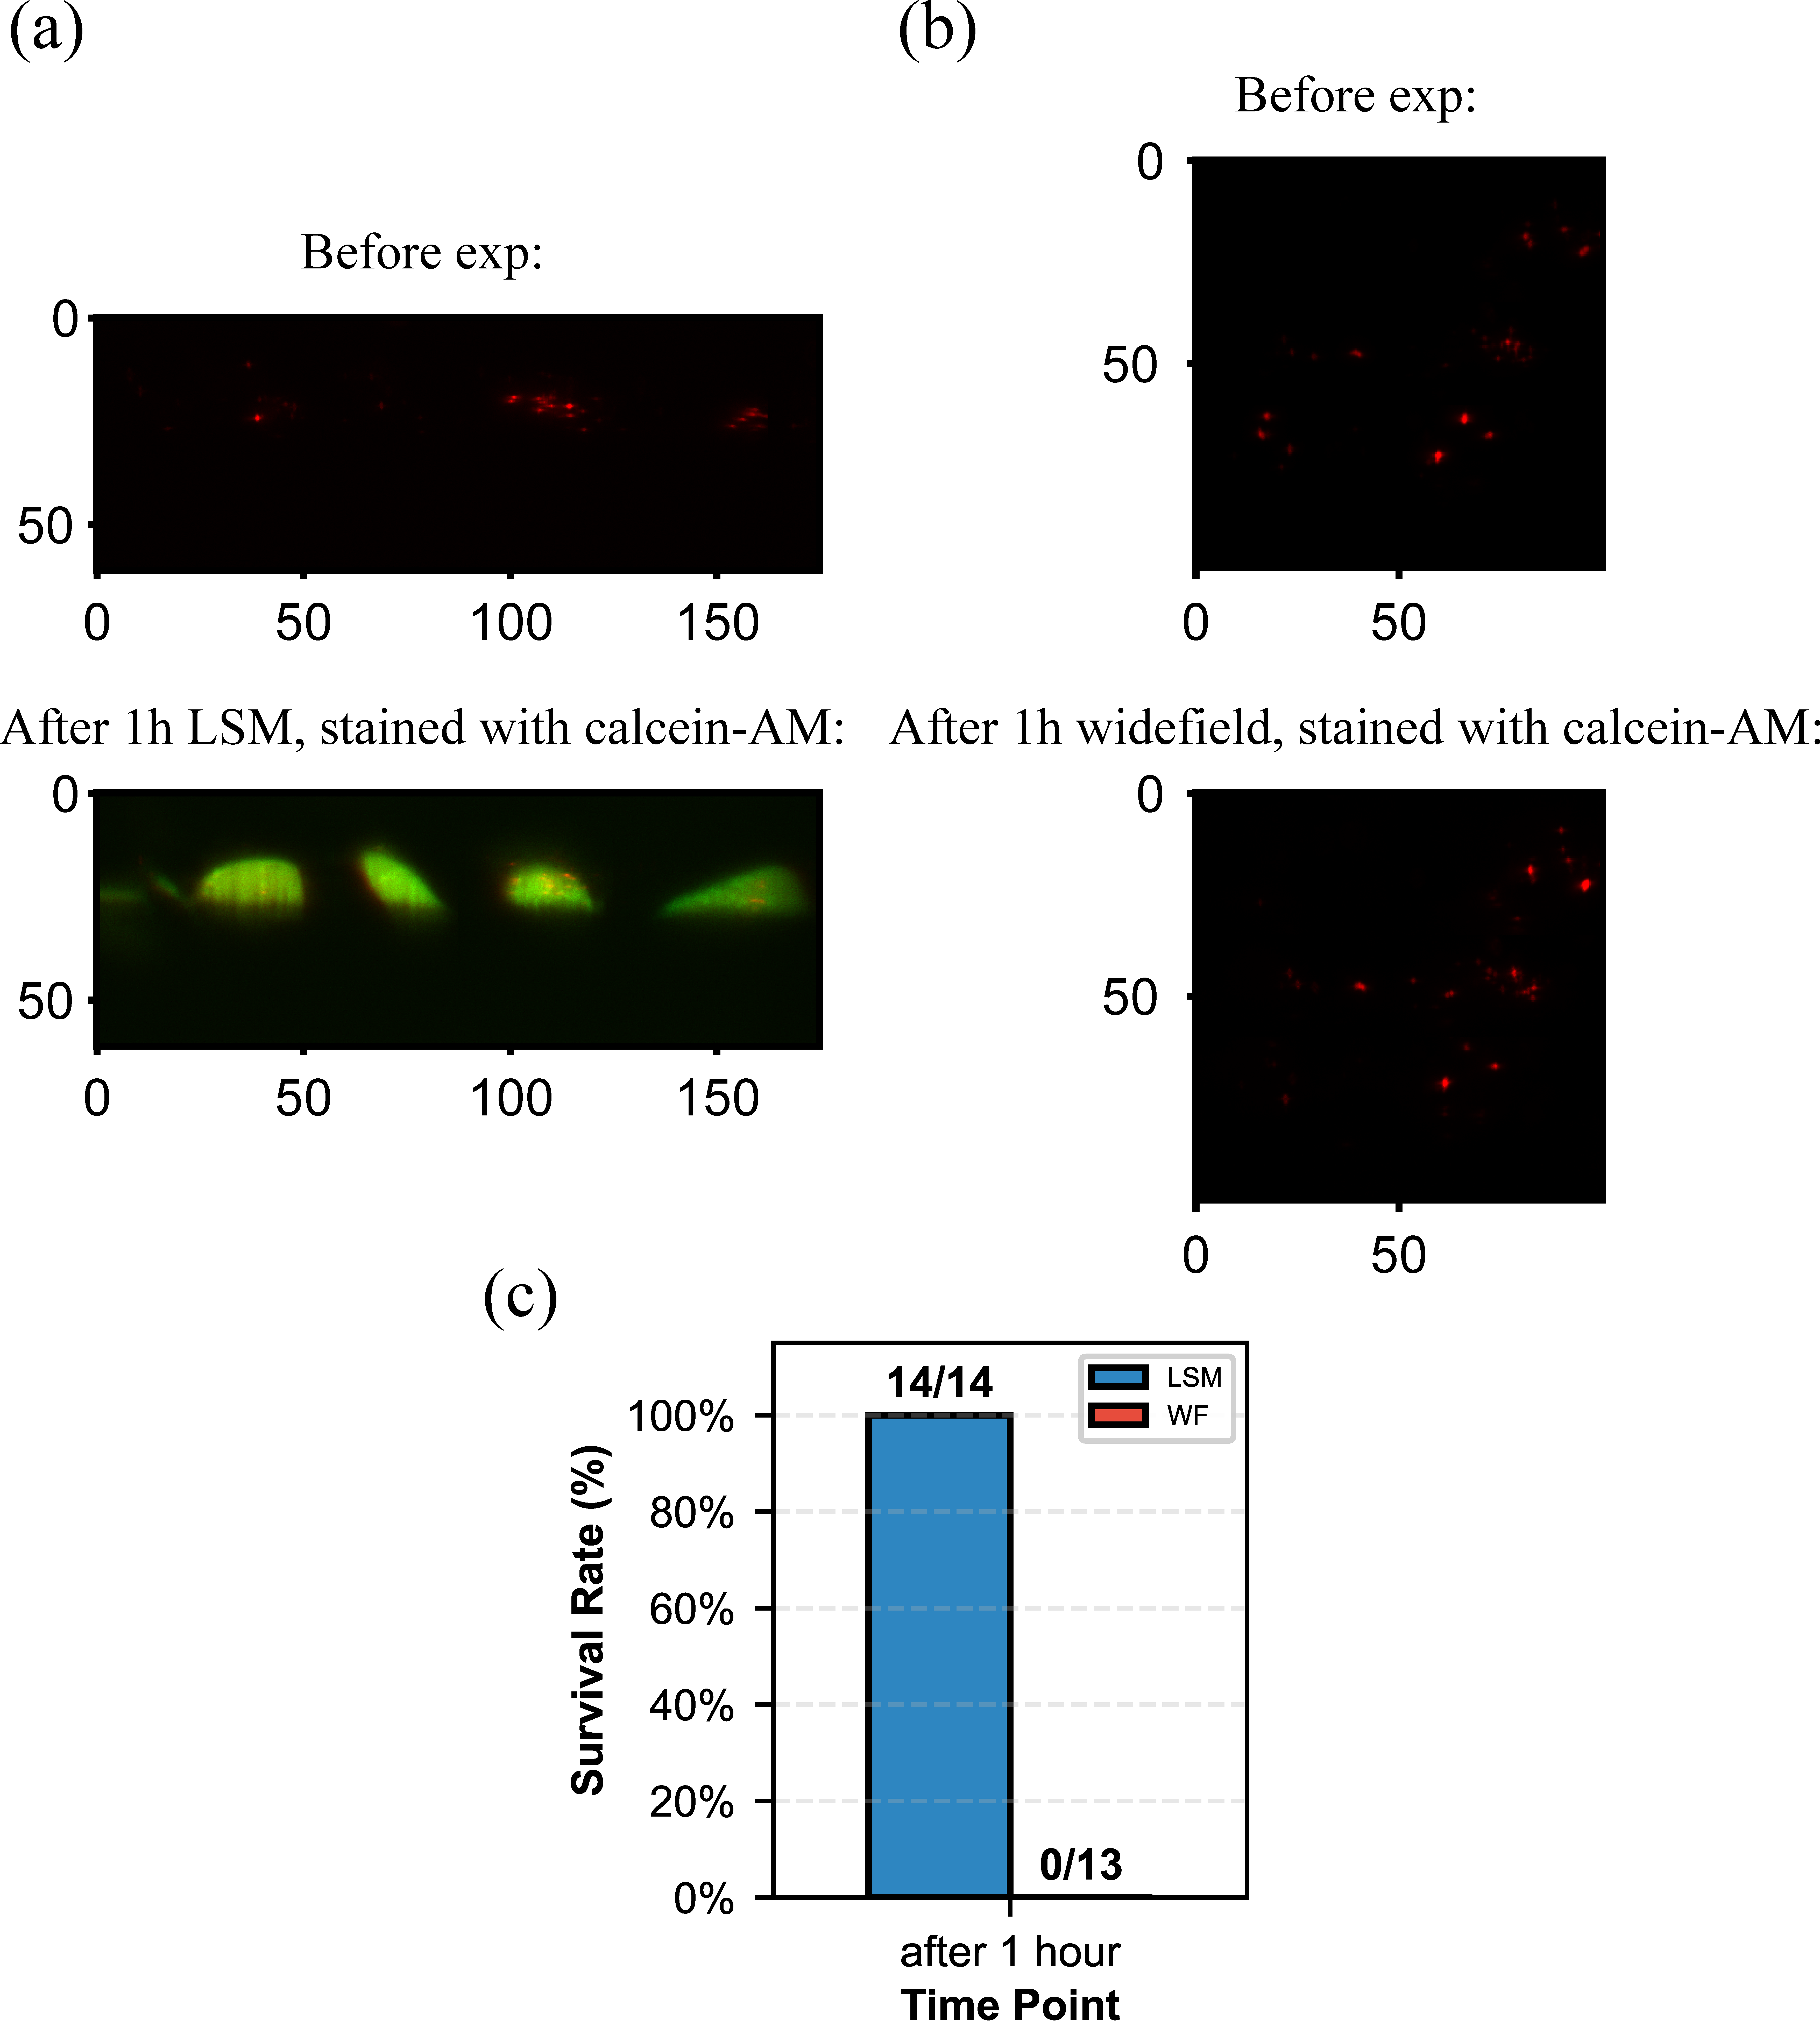


**Supplementary Figure S6 |** Calcein-AM staining for assessing HeLa cell viability. HeLa cells were irradiated for one hour with either LSM or widefield illumination with a power density of 5 while the three-dimensional intracellular ND-based ODMR sensing was conducted, followed by staining with calcein-AM. (a) Results for four representative HeLa cells under LSM illumination. Prior to the experiment, only red fluorescence from NDs was observed. After one hour of LSM illumination and subsequent addition of calcein-AM, all four cells were positively stained, exhibiting green fluorescence, which confirmed the cell viability. (b) Results for four representative HeLa cells under widefield illumination. Similarly, only ND fluorescence was seen initially. After one hour of widefield irradiation and calcein-AM staining, no green fluorescence was detected in any of the four cells, which indicated the loss of cell viability. (c) Cell survival rates following one hour illumination with either LSM or widefield (WF), being 14/14 and 0/13, respectively. The tick marks on both axes in all panels of (a) and (b) are in m.

**
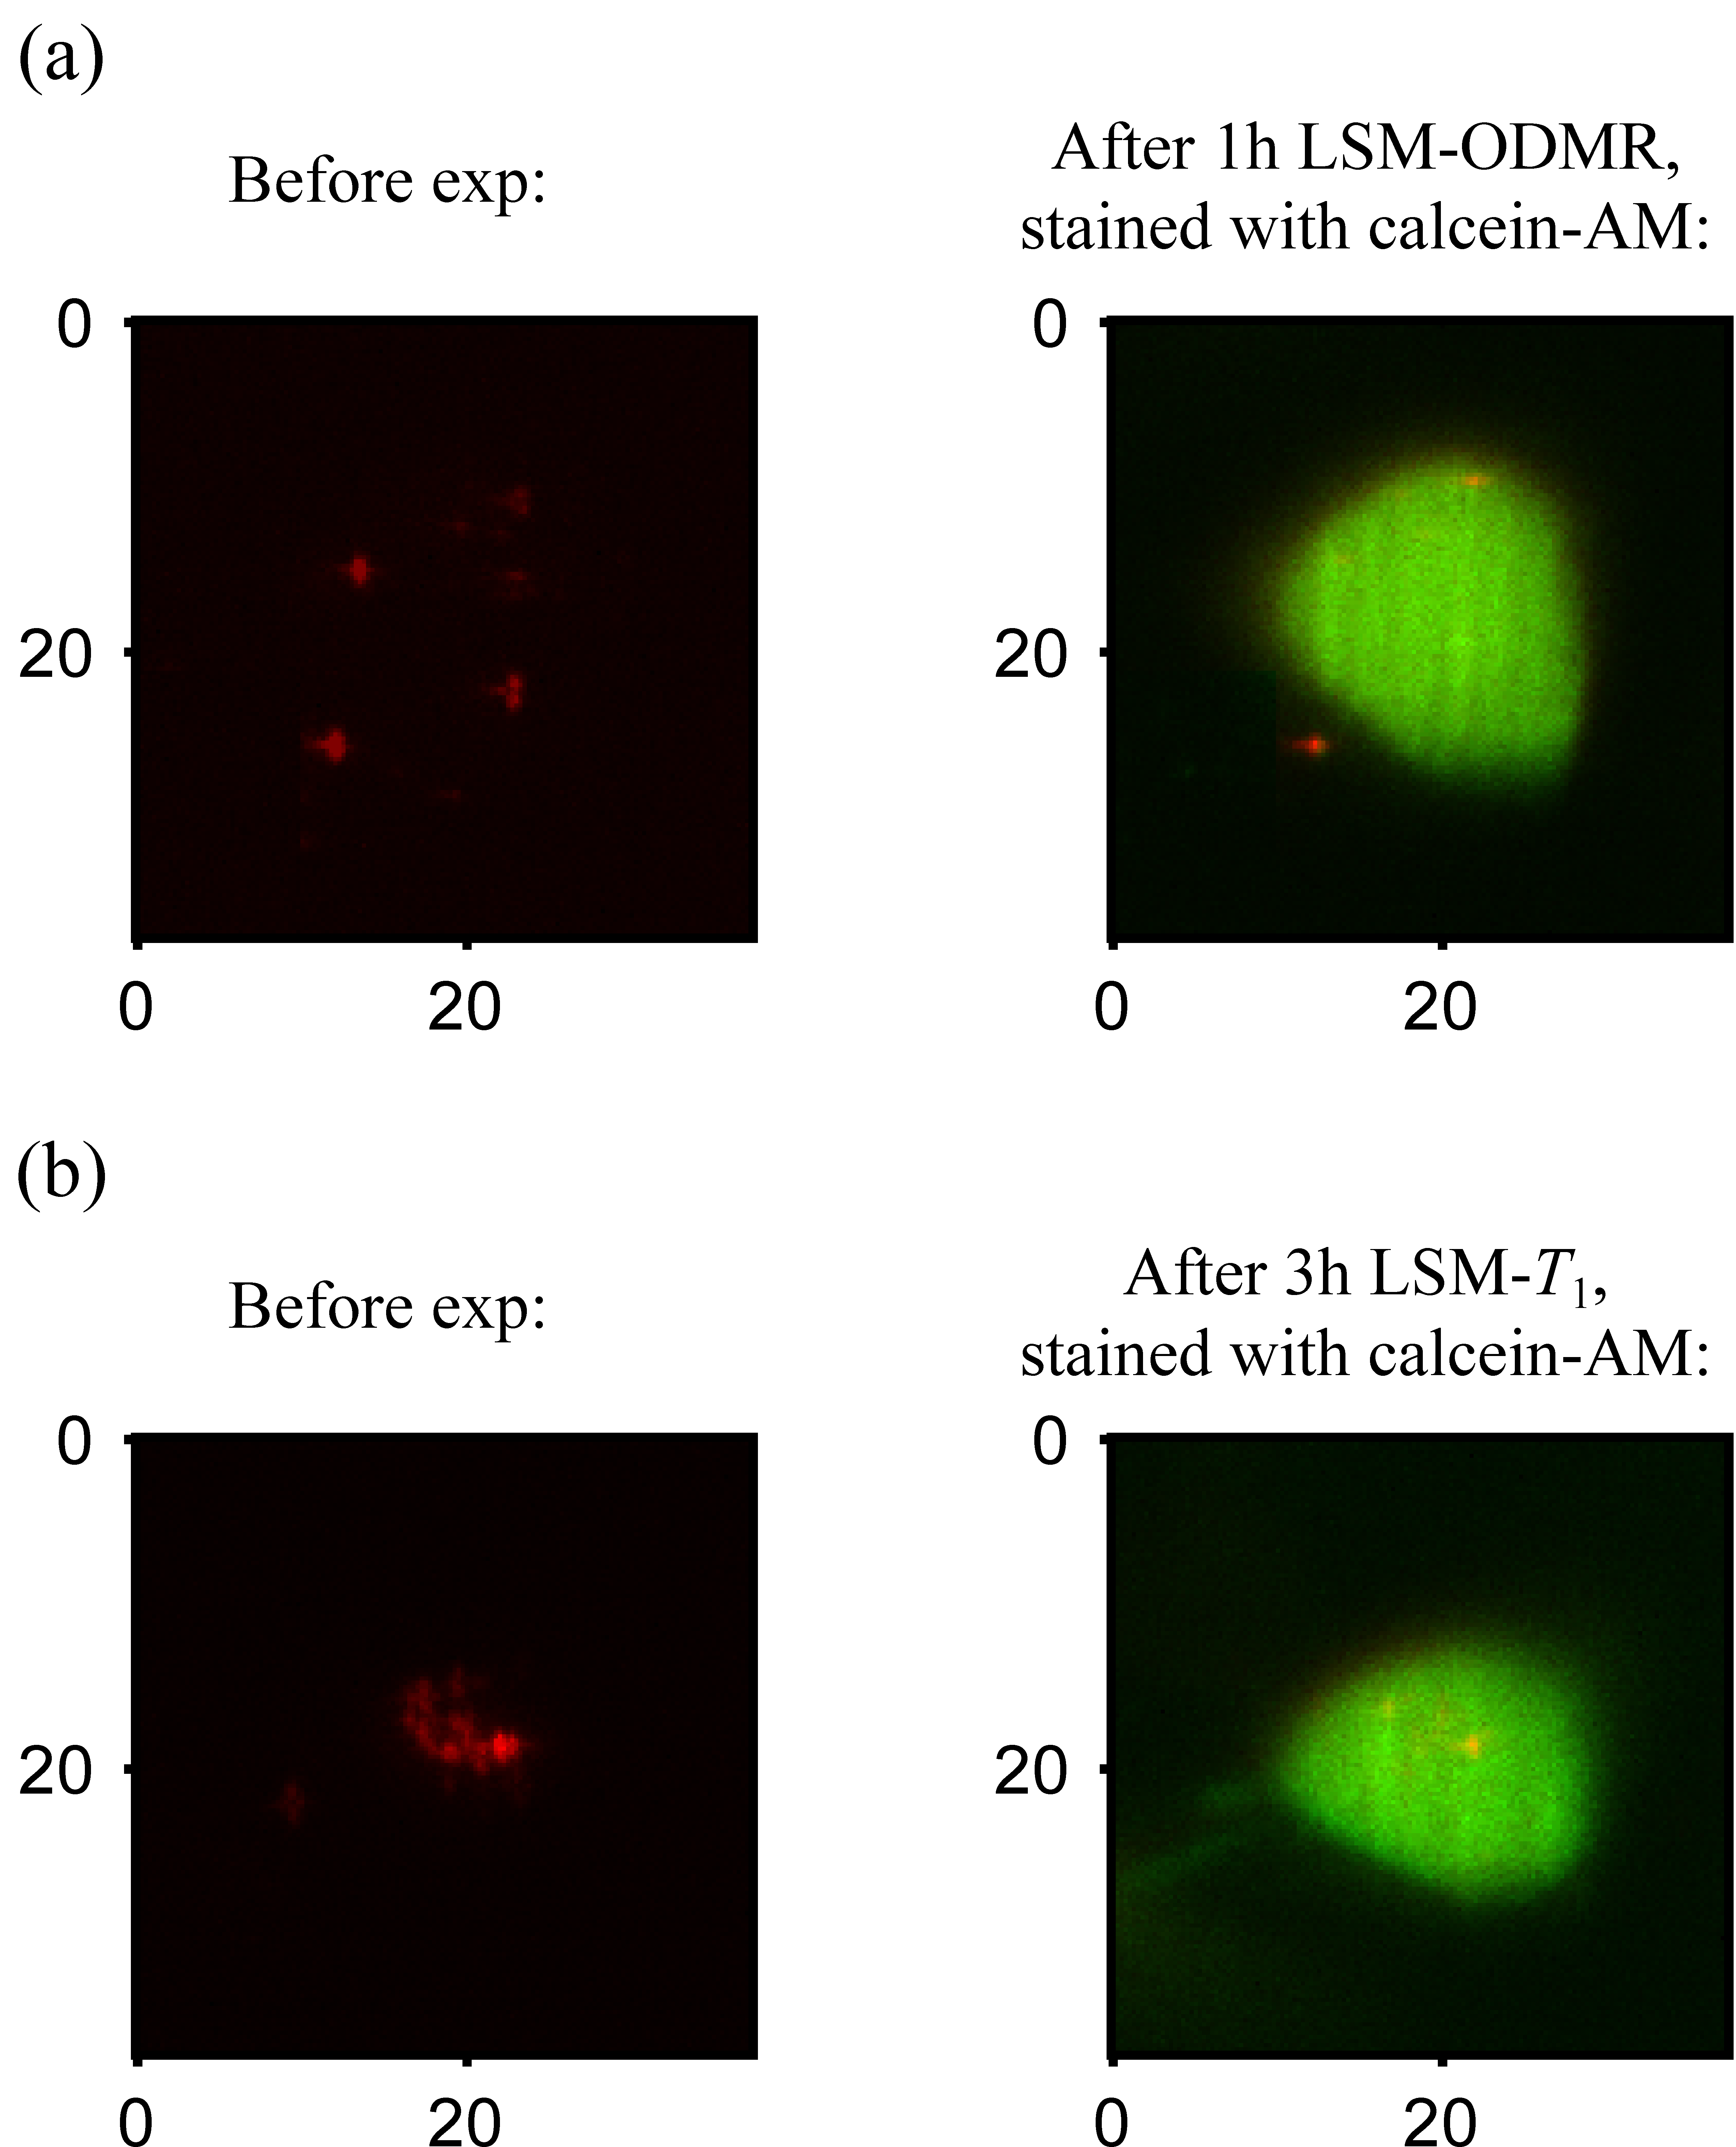
**

**Supplementary Figure S7 |** (a) Following the long-term intracellular ODMR monitoring experiment (for approximately one hour) in Fig. 3(g), cell viability was confirmed by calcein-AM staining. (b) Following the long-term intracellular  monitoring experiment (for approximately three hours) in Figs. 4(c) and 4(d), cell viability was confirmed by calcein-AM staining. The tick marks on both axes in all panels of (a) and (b) are in m.


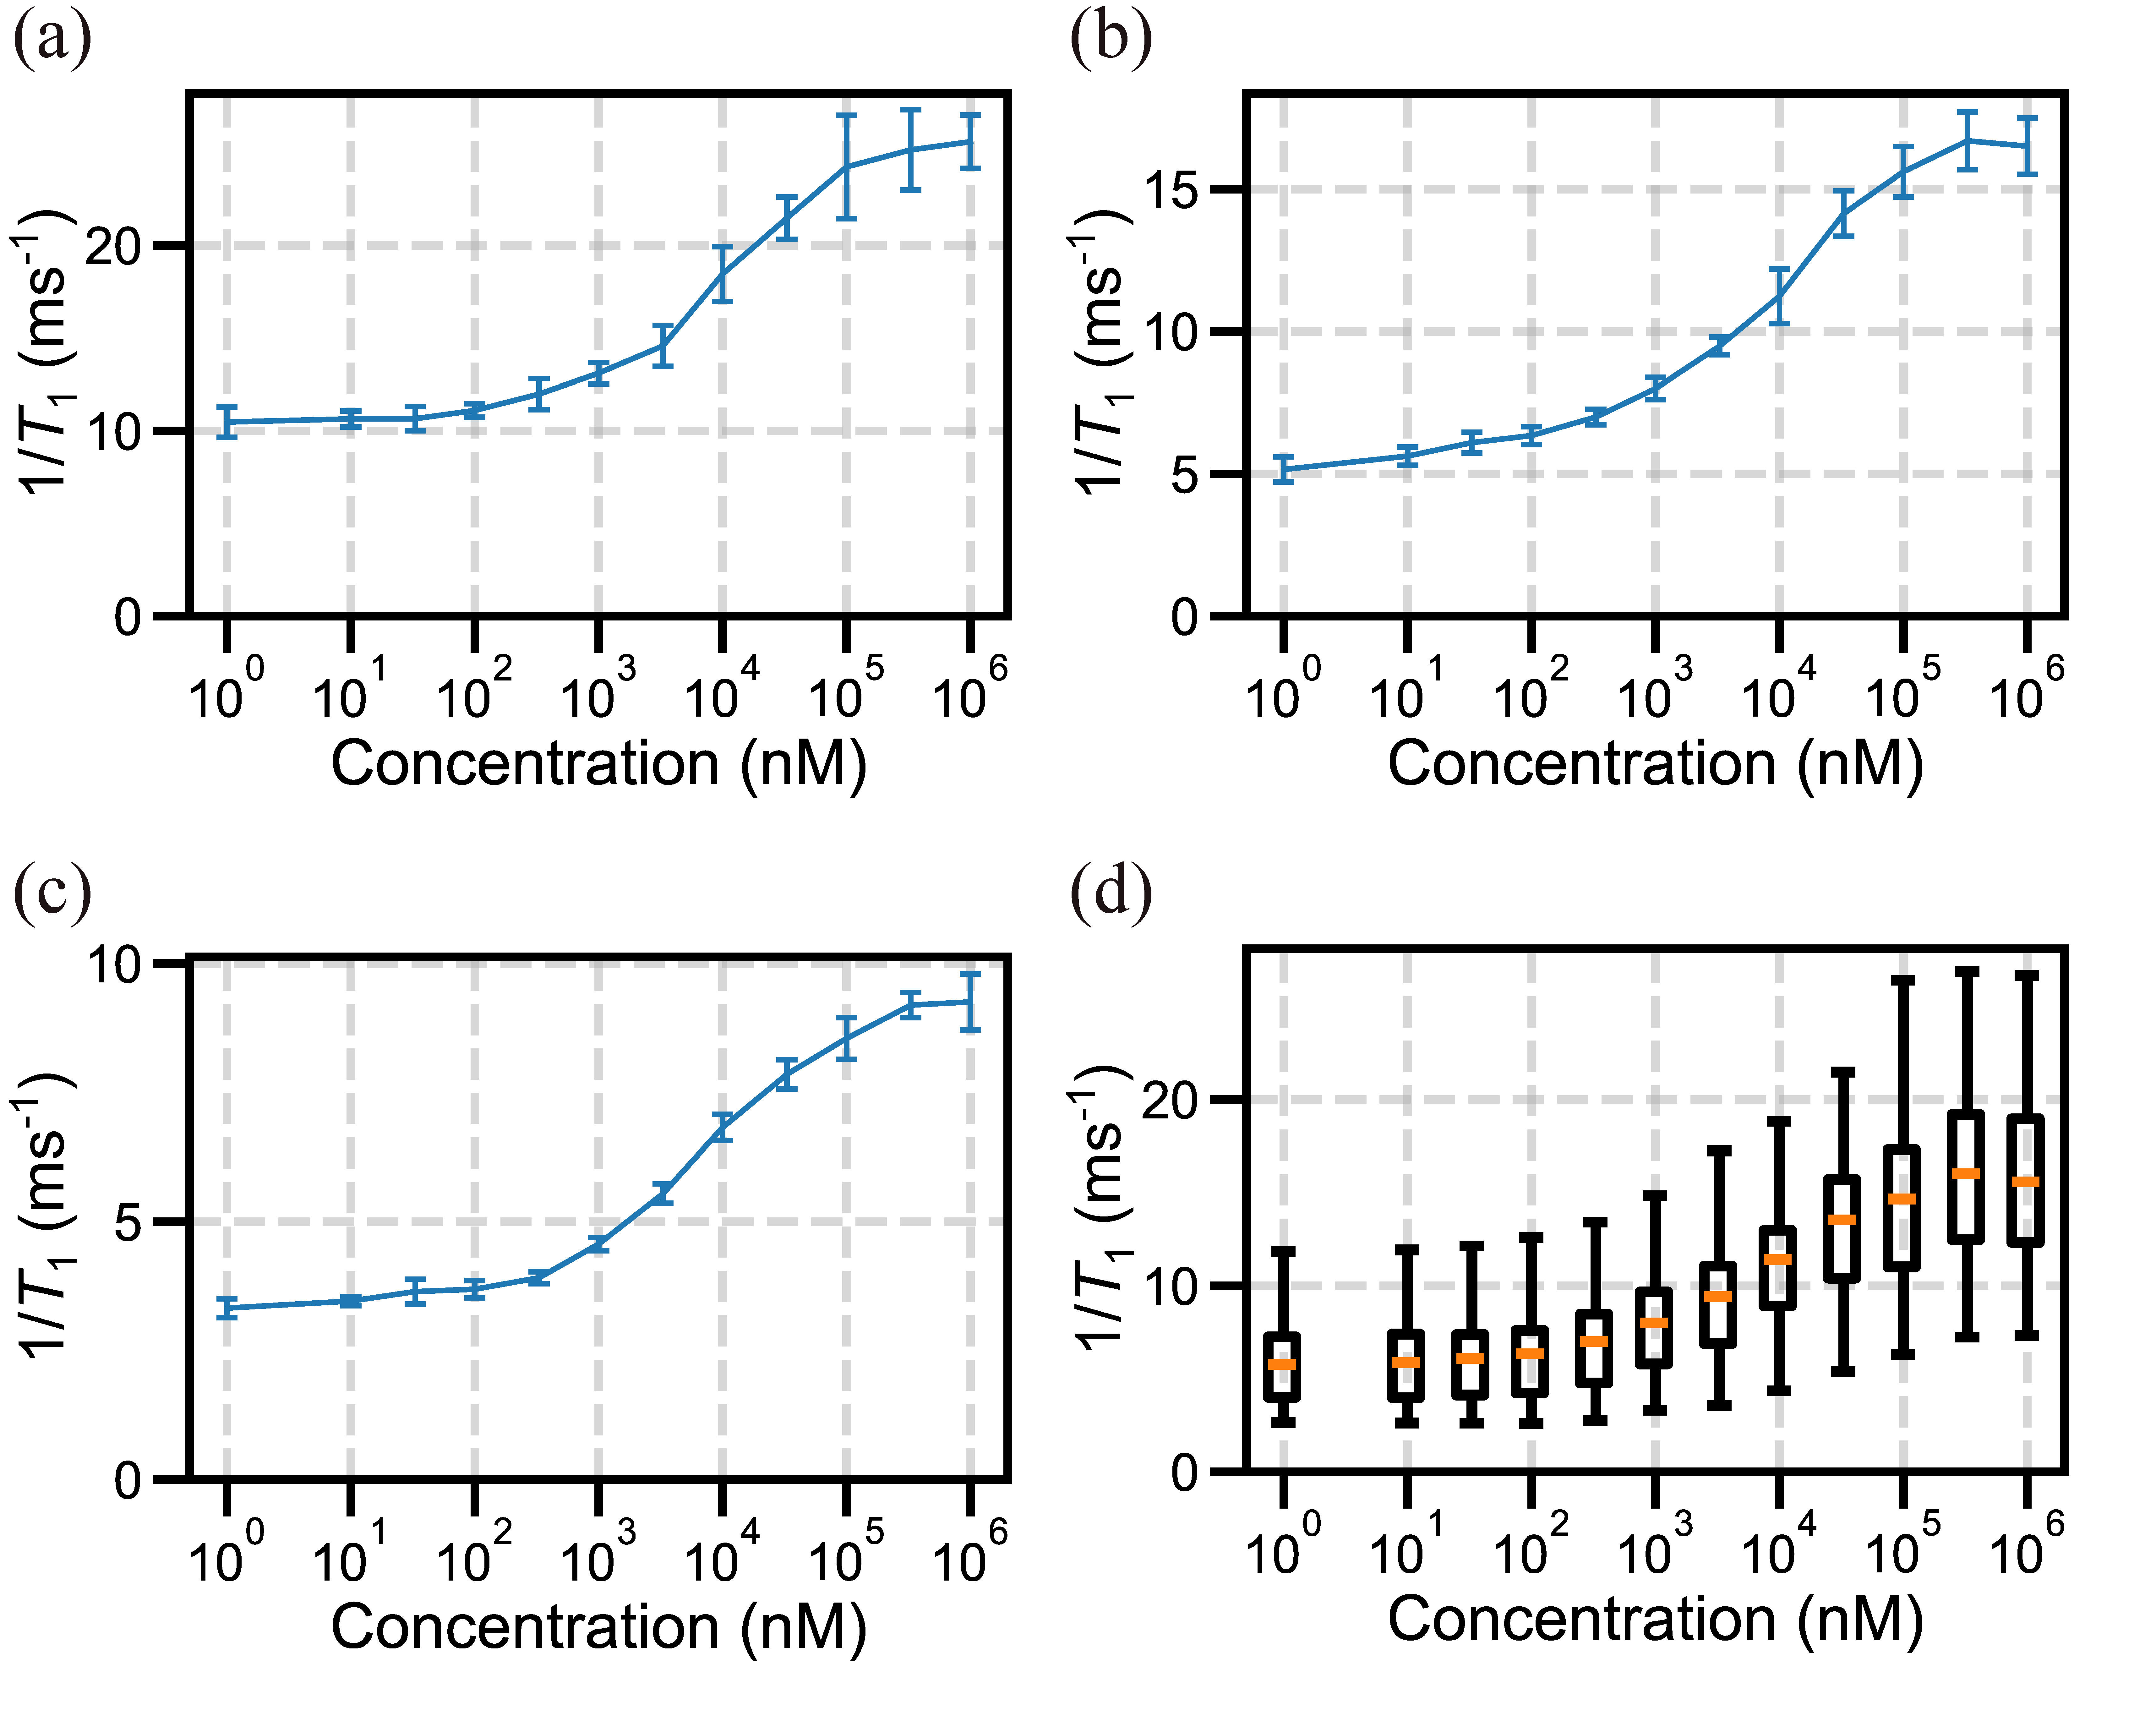


**Supplementary Figure S8 |** ND relaxometry of paramagnetic ion  concentration using the LSM setup. NDs deposited on a tilted coverslip were immersed in aqueous solutions of varying concentrations (from 1 nM to 1 mM). The longitudinal relaxation times () of 23 individual NDs were measured. The  values of these NDs exhibited a broad distribution, ranging from 80 s to 380 s. (a)-(c) show the  response of three representative NDs as a function of  concentration. The plots display the relaxation rate (1/, in ) versus the  concentration (in nM). The values of these three NDs in the absence of  were 95.4 s, 194.0 s, and 300.7 s, respectively. For each ND at each concentration, ten independent measurements were performed, with each measurement lasting 270 seconds; the error bars represent the standard deviation of these ten measurements. (d) summarizes the concentration-dependent relaxation rates for all 23 NDs. The longitudinal relaxation rate of the NDs increased with the concentration of paramagnetic ions, with pronounced response of the spin relaxation rates to concentration change in the range of 100 nM to 100 M and saturation at mM concentrations.


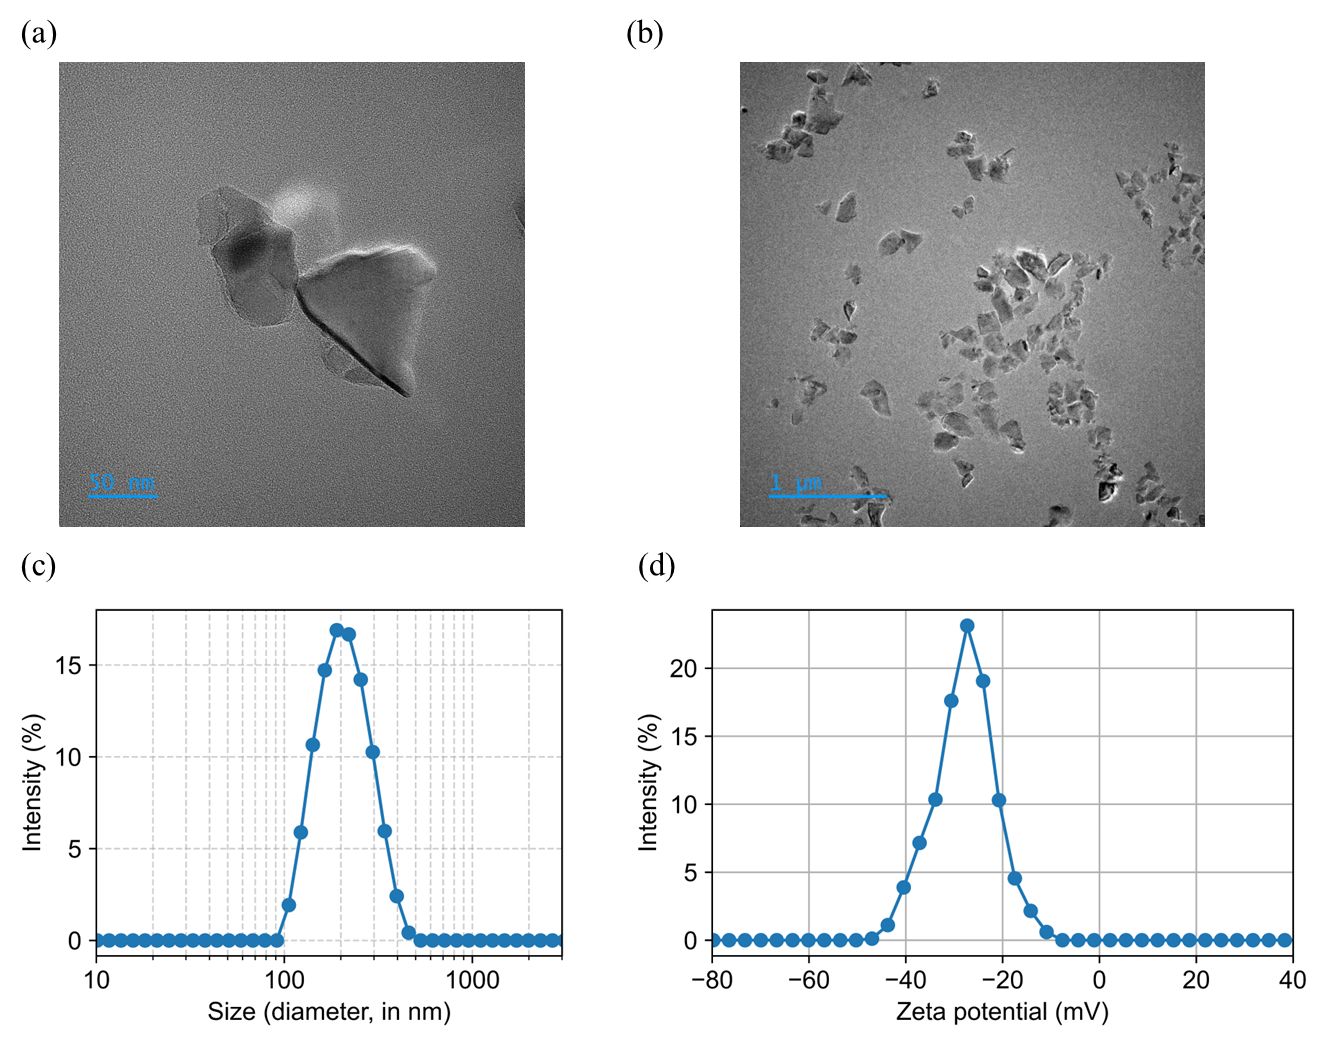


**Supplementary Figure S9 |** Characterization of nanodiamonds. (a)-(b) TEM images of ND samples. (c) Dynamic light scattering (DLS) measurement showing the distribution of hydrodynamic diameters of NDs. (d) Zeta potential measurement of NDs.

**Supplementary** **Note 1 | LSM-ODMR setup**

Before starting an experiment, the positions of the sample and the light sheet should be adjusted to be brought into the focal plane of the collection objective O2. Both O2 and the sample can be moved in a centimeter scale translational motion along the axis (enabled by the focus knob of the FN1 microscope body and the sample stage, respectively). This enables the alignment of the focal plane of O2, the sample and the light sheet along the direction. The two optical elements O1 and CL are fixed on a 1D manual stage along the direction which is the propagation direction of the laser. So, the position of the light sheet in the axis can be adjusted (the light sheet can be put in the middle of the field of view of O2).

For comparative experiments between LSM and conventional widefield illumination, the excitation optical path of the setup can be switched to a traditional widefield configuration, as shown in Figure S3.

**Supplementary Note 2 | The shape of the light sheet**

In the LSM-ODMR setup, a Gaussian light sheet was employed. The waist radius  [1] of the Gaussian beam is given by

where is the laser wavelength and NA is the numerical aperture of the objective. At the waist, the intensity falls to of its axial maximum. The Rayleigh range [2] of the Gaussian beam is

where is the refractive index of the medium. In our case, with = 532 nm, NA = 0.21, and = 1.33, we obtain = 1.042 m and a light-sheet length (defined as twice the Rayleigh range) of 17.05 m. In practice, due to optical aberration and other system imperfections, the measured waist radius was 1.158 m, and the light-sheet length was about 24 m.

**Supplementary Note 3 | Comparison of phototoxicity of LSM and widefield illumination using** **Propidium Iodide staining as a positive indicator of cell death**

To compare the phototoxicity of LSM and widefield illumination, we utilized PI staining as a positive indicator of cell death. PI is a fluorescent dye that is excluded by cells that have intact plasma membranes. However, PI can penetrate cells that have compromised membrane integrity and bind to double-stranded DNA inside the cells. For a set of control experiments, two coverslips were placed at the bottom of the same confocal dish. HeLa cells were then seeded and allowed to grow to an appropriate density on the coverslips. For the experiment, Each coverslip was then transferred to the LSM-ODMR setup for measurement—one under LSM illumination and the other under widefield illumination—ensuring that all conditions were identical except for the illumination method. Prior to the experiment, PI solution (Thermofisher, BMS500PI) was added to the cell culture medium to a final concentration of 1 g/ml, a concentration established to be non-toxic to the cells (The PI stock solution was dissolved in Annexin V Binding Buffer, a non-toxic solvent for cells). Using the fluorescence of NDs distributed within the cells, the cells were positioned at the focal point of the excitation objective and the collection objective. Subsequently, cells were illuminated with the 532 nm laser at a power density of approximately 5 using either the LSM or widefield modality. For each plane, the laser illumination was applied continuously for approximately 50 seconds for sufficient signal-to-noise ratio ODMR acquisition from most NDs. The focal plane was then vertically moved to the next plane. Given a light-sheet thickness of 2 m, each scan excited NDs within a 2 m axial range; To fully sample a cell with a height of approximately 10 m, a total of 5–6 such axial steps were required. In the LSM mode, only the focused plane was illuminated. In contrast, during widefield illumination, the entire cell volume was exposed to laser light during the acquisition of data at every plane.

Viable cells exhibited fluorescence only from the intracellular NDs (without PI penetration). Intense red fluorescence throughout the entire cell indicated cell death, with the nucleus being the brightest region. In addition to this strong PI fluorescence, dead cells also exhibited distinct membrane blebbing. The statistical results for cell viability over time are presented in Fig. 3(f), and a typical time-lapse image series of HeLa cells is shown in Fig. S5. Throughout the experimental procedure, the temperature, concentration, and humidity were maintained at 37 ℃, 5%, and > 90%, respectively.

**Supplementary Note 4 | Comparison of phototoxicity of LSM and widefield illumination using calcein-AM staining as a negative indicator of cell death**

In addition to the PI-based assessment, an independent endpoint assay using the vital dye calcein-AM was performed on a separate set of cells to compare the phototoxicity of LSM and that of widefield illumination at an identical laser power density. The cell-permeant calcein-AM ester is non-fluorescent. Within live cells, intracellular esterases hydrolyze the acetoxymethyl (AM) esters, converting calcein-AM into the intensely green fluorescent calcein, which is retained in the cell. As with the previous section, two cell samples grown in parallel (i.e., under identical conditions and at the same time) were used for a set of control experiments. Cells were first located and positioned at the focal point of the objectives using the fluorescence from intracellularly distributed NDs. Cells were then continuously irradiated for one hour with the 532 nm laser, using either the LSM or widefield illumination mode, at a power density of approximately 5 . The illumination protocol was identical to that used for the PI staining experiments (Each plane was continuously illuminated for 50 seconds and then shifted to the next plane). After the one-hour irradiation period, calcein-AM (Thermofisher, C3100MP) was added to the cell culture medium to a final concentration of 1 g/ml. The cells were then incubated for 15 minutes to allow for dye uptake and enzymatic conversion. The presence of green fluorescence indicated cell viability, whereas the absence of green fluorescence signified cell death or loss of activity. A representative set of images of the cells before and after the experiment is presented in Fig. S6. Throughout the experimental procedure, the temperature, concentration, and humidity were maintained at 37 ℃, 5%, and > 90%, respectively.

**Supplementary Note 5 | Intracellular NDs**

The LSM-ODMR method enables widefield detection, allowing simultaneous measurement of multiple NDs within a two-dimensional plane. In current intracellular measurements (both ODMR and relaxometry), this approach yields signals with low error for NDs exhibiting restricted mobility, as they remain within the illuminated volume of the light sheet throughout the acquisition. In contrast, fast-moving NDs frequently move in and out of the light-sheet excitation region during the measurement, resulting in large fluctuations in photon counts. This leads to substantially increased signal errors or even complete signal loss.

**REFERENCES**

1. Urey, H. Spot size, depth-of-focus, and diffraction ring intensity formulas for truncated Gaussian beams. *Applied optics* 43, 620–625 (2004).
2. Self, S. A. Focusing of spherical Gaussian beams. *Applied optics* 22, 658–661 (1983).
